# Supplementary material
Source: ML conference proceedings conference paper supplement (https://aclanthology.org/2026.semeval-1.452)
Supplement: SupplementaryMaterial [file 19_affiliations_countries_list.pdf › latex/figures/19_affiliations_countries_list.pdf]

## Official affiliations: Countries of participants

Bangladesh

Taiwan

USA

Nigeria

UK

Vietnam
