# Supplementary material
Source: ML conference proceedings conference paper supplement (https://aclanthology.org/2026.semeval-1.452)

Form submissions over time

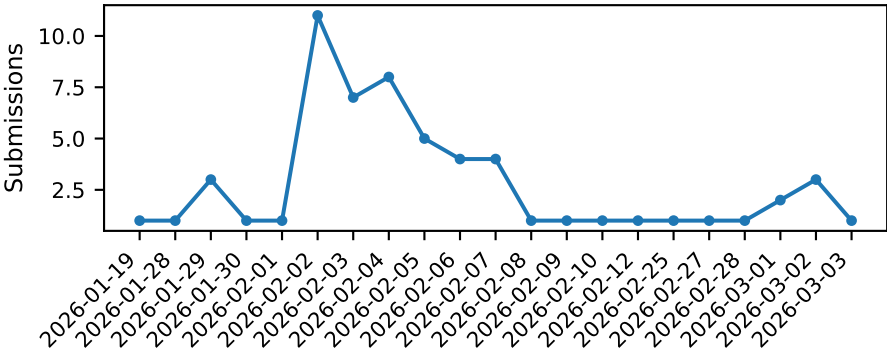

Supplement: SupplementaryMaterial [file 01_submissions_over_time.pdf › latex/figures/01_submissions_over_time.pdf]

## Track A: Participation

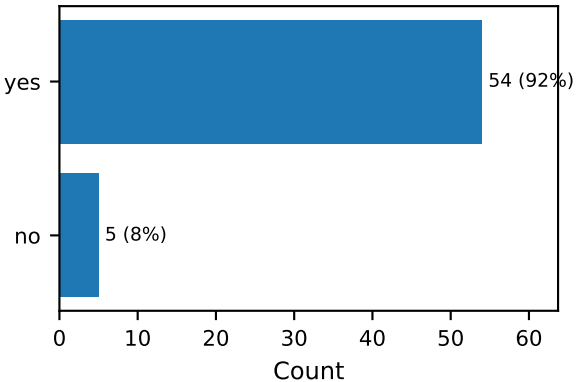

Supplement: SupplementaryMaterial [file 02_track_a_yes_no.pdf › latex/figures/02_track_a_yes_no.pdf]

## Track B: Participation

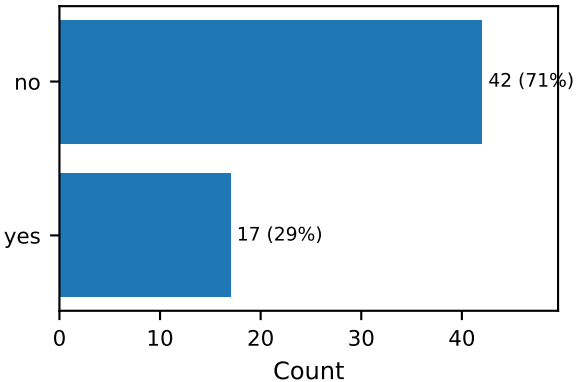

Supplement: SupplementaryMaterial [file 02_track_b_yes_no.pdf › latex/figures/02_track_b_yes_no.pdf]

Track A: Submitted subtask-language-domain

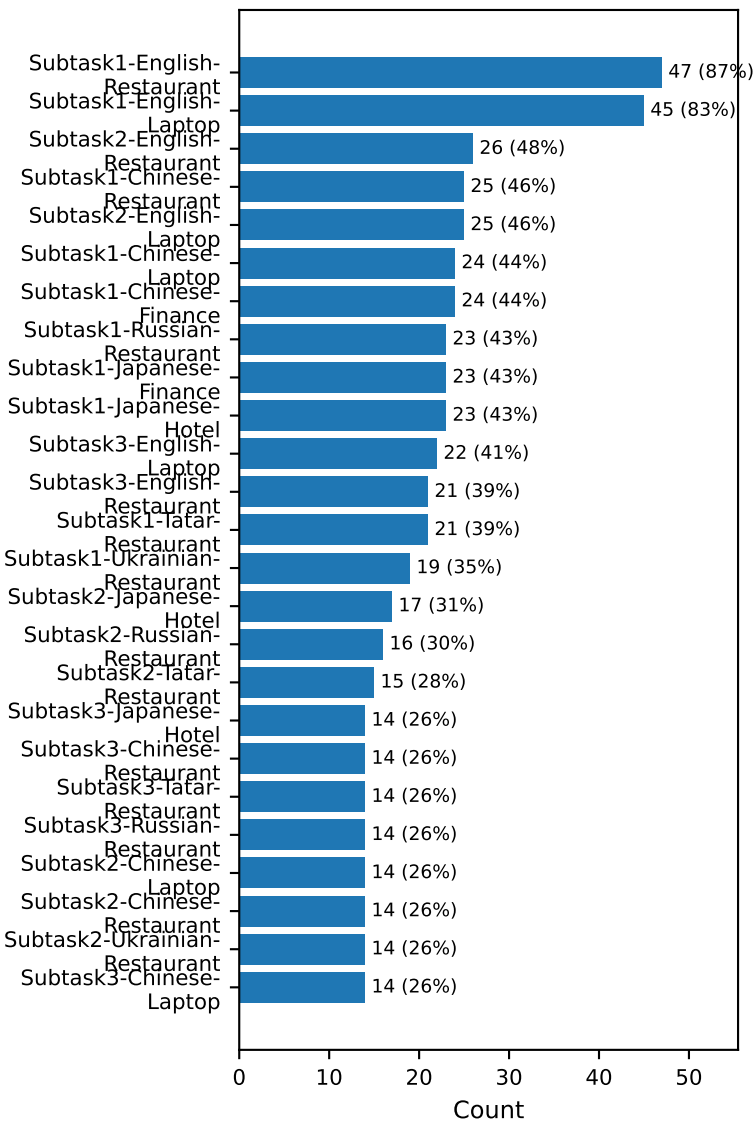

Supplement: SupplementaryMaterial [file 03_track_a_submissions_top.pdf › latex/figures/03_track_a_submissions_top.pdf]

# Architecture types

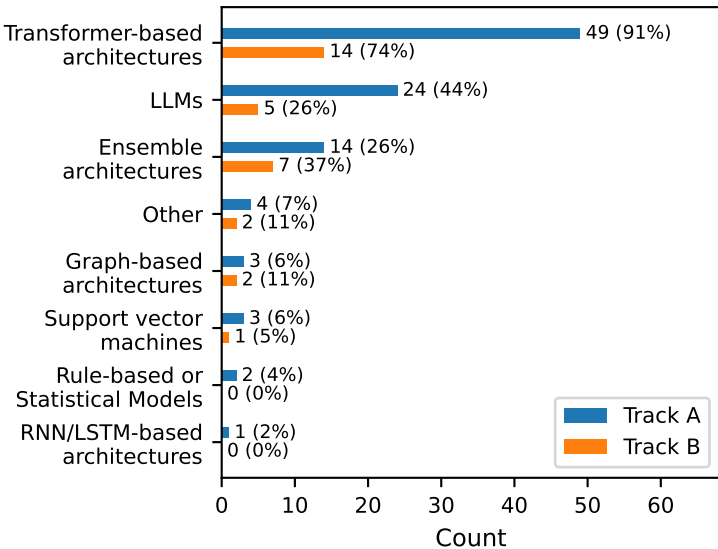

Supplement: SupplementaryMaterial [file 04_architecture_track_a_vs_b.pdf › latex/figures/04_architecture_track_a_vs_b.pdf]

## Track A: Architecture types

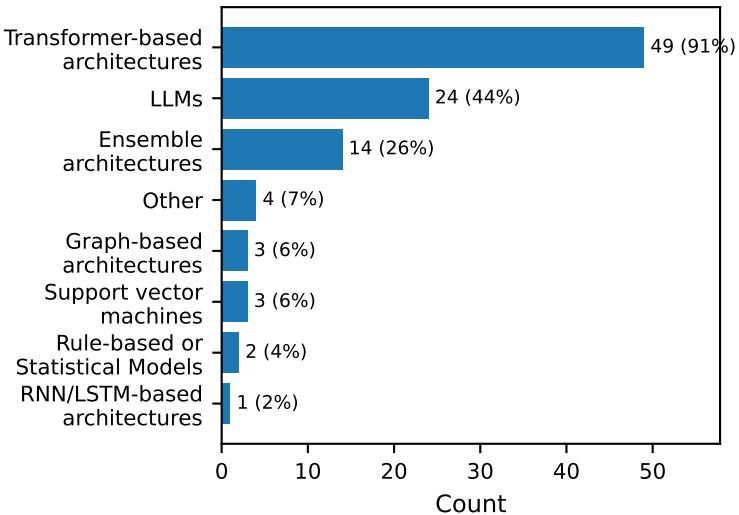

Supplement: SupplementaryMaterial [file 04_track_a_architecture_top.pdf › latex/figures/04_track_a_architecture_top.pdf]

Track B: Architecture types

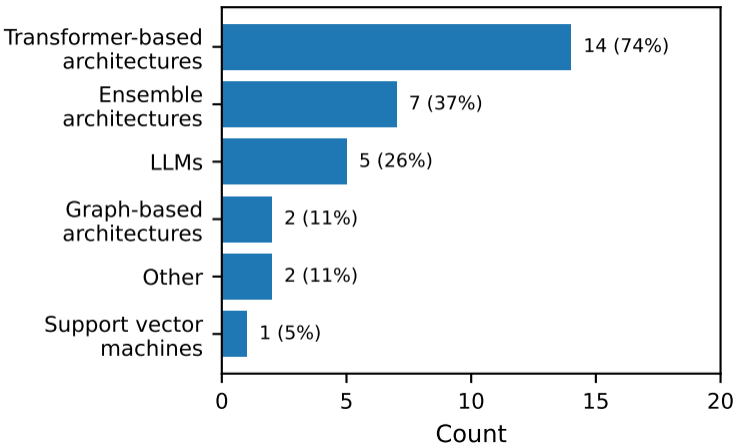

Supplement: SupplementaryMaterial [file 05_track_b_architecture_top.pdf › latex/figures/05_track_b_architecture_top.pdf]

Track A: LLM usage

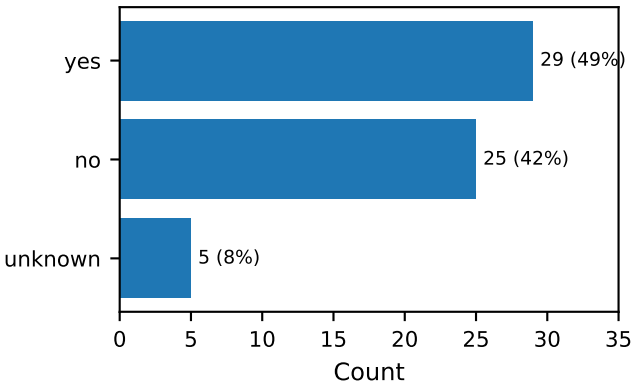

Supplement: SupplementaryMaterial [file 06_track_a_llm_usage.pdf › latex/figures/06_track_a_llm_usage.pdf]

Track B: LLM usage

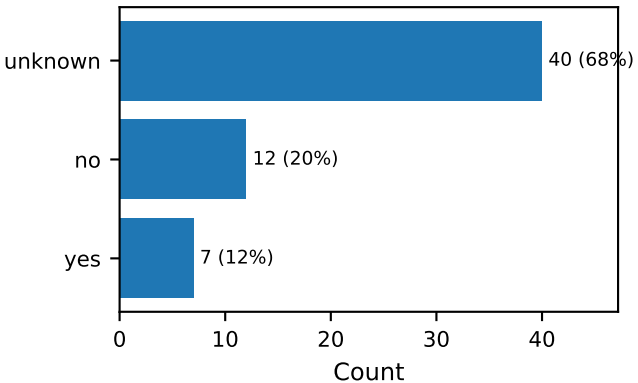

Supplement: SupplementaryMaterial [file 07_track_b_llm_usage.pdf › latex/figures/07_track_b_llm_usage.pdf]

Track A: Training techniques

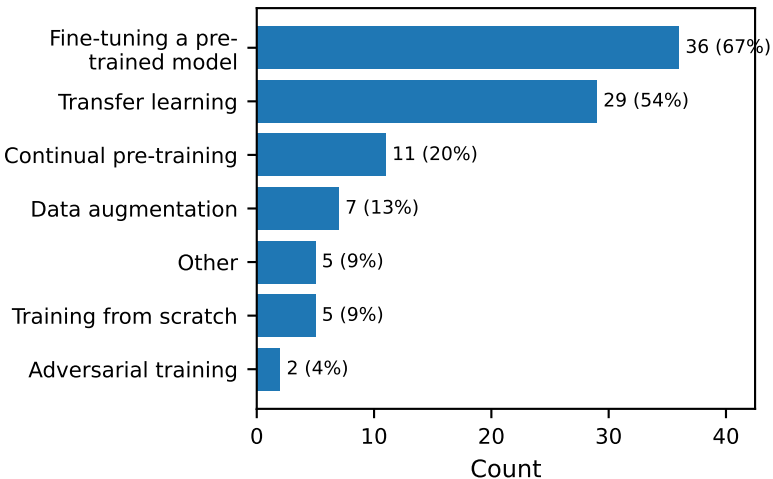

Supplement: SupplementaryMaterial [file 08_track_a_training_techniques_top.pdf › latex/figures/08_track_a_training_techniques_top.pdf]

## Track B: Training techniques

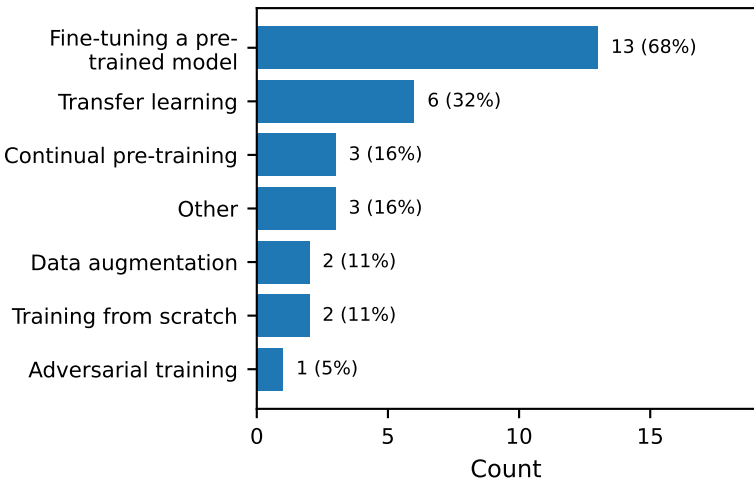

Supplement: SupplementaryMaterial [file 09_track_b_training_techniques_top.pdf › latex/figures/09_track_b_training_techniques_top.pdf]

Track B: Submitted languages

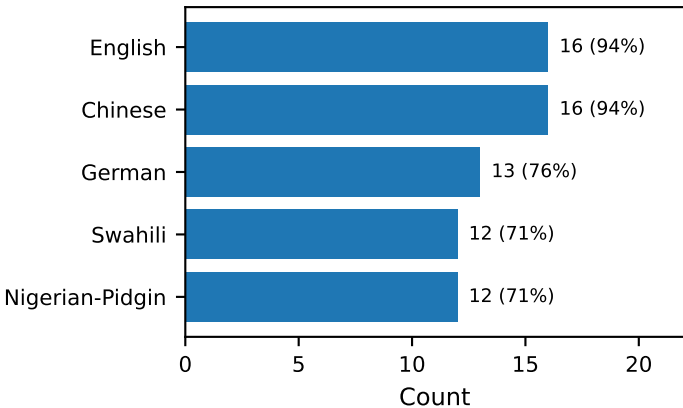

Supplement: SupplementaryMaterial [file 10_track_b_languages_top.pdf › latex/figures/10_track_b_languages_top.pdf]

# Training techniques

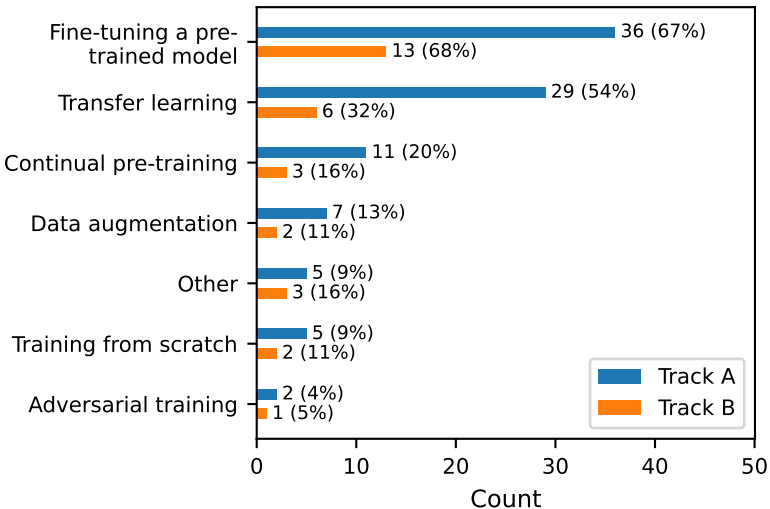

Supplement: SupplementaryMaterial [file 11_training_techniques_track_a_vs_b.pdf › latex/figures/11_training_techniques_track_a_vs_b.pdf]

## Top LLMs used

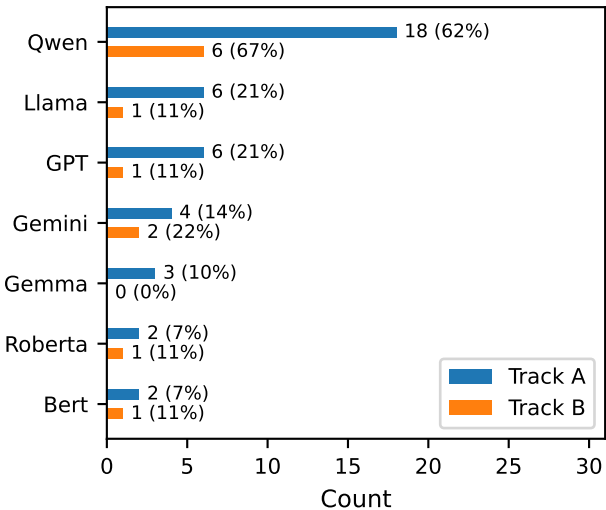

Supplement: SupplementaryMaterial [file 12_top_llms_track_a_vs_b.pdf › latex/figures/12_top_llms_track_a_vs_b.pdf]

# Prompting strategies

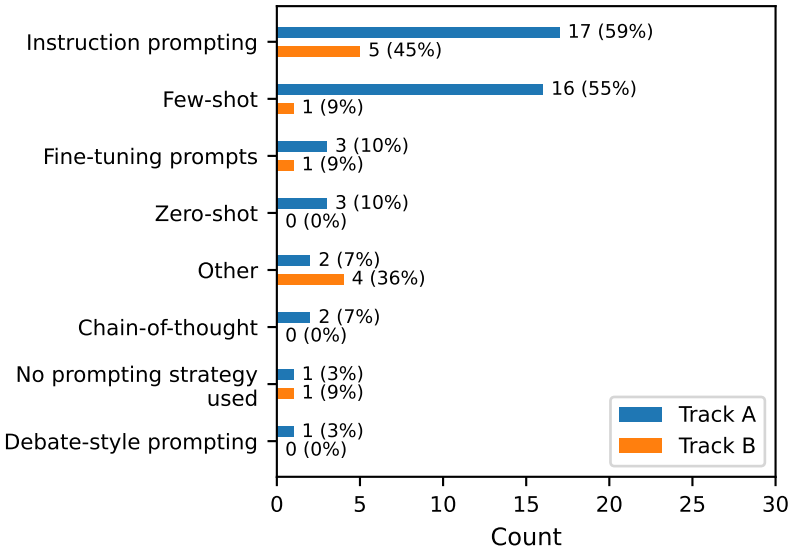

Supplement: SupplementaryMaterial [file 13_prompting_strategies_track_a_vs_b.pdf › latex/figures/13_prompting_strategies_track_a_vs_b.pdf]

# External data usage

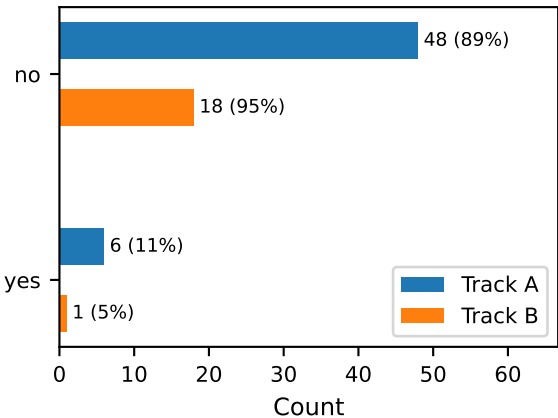

Supplement: SupplementaryMaterial [file 14_external_data_track_a_vs_b.pdf › latex/figures/14_external_data_track_a_vs_b.pdf]

# Data augmentation usage

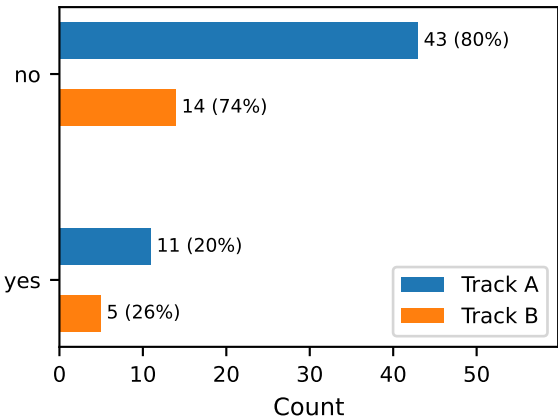

Supplement: SupplementaryMaterial [file 15_data_augmentation_track_a_vs_b.pdf › latex/figures/15_data_augmentation_track_a_vs_b.pdf]

## Fine-tuning strategy

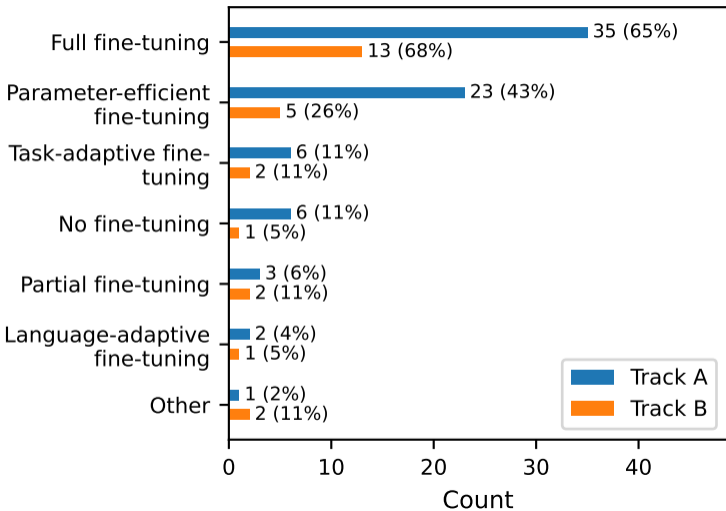

Supplement: SupplementaryMaterial [file 16_finetune_model_track_a_vs_b.pdf › latex/figures/16_finetune_model_track_a_vs_b.pdf]

# LLM fine-tuning

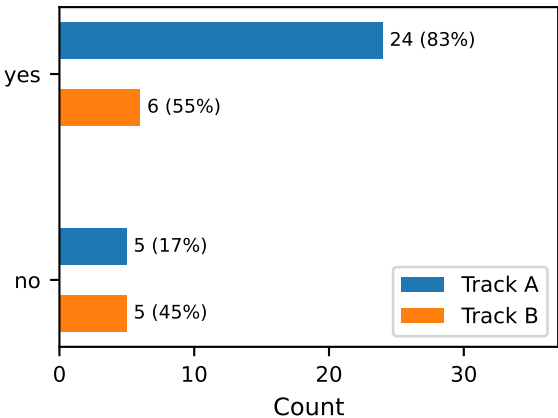

Supplement: SupplementaryMaterial [file 17_llm_finetune_track_a_vs_b.pdf › latex/figures/17_llm_finetune_track_a_vs_b.pdf]

# External knowledge usage

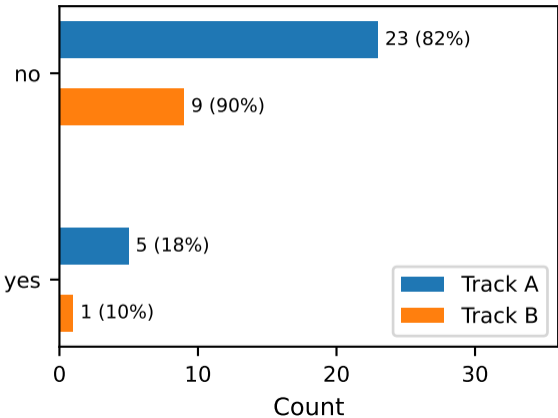

Supplement: SupplementaryMaterial [file 18_external_knowledge_track_a_vs_b.pdf › latex/figures/18_external_knowledge_track_a_vs_b.pdf]

## Official affiliations: Countries (top)

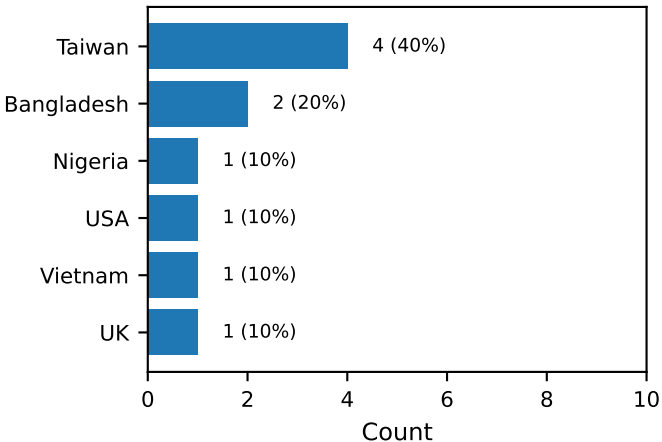

Supplement: SupplementaryMaterial [file 20_affiliations_countries_top.pdf › latex/figures/20_affiliations_countries_top.pdf]

# Official affiliations: Countries of participants

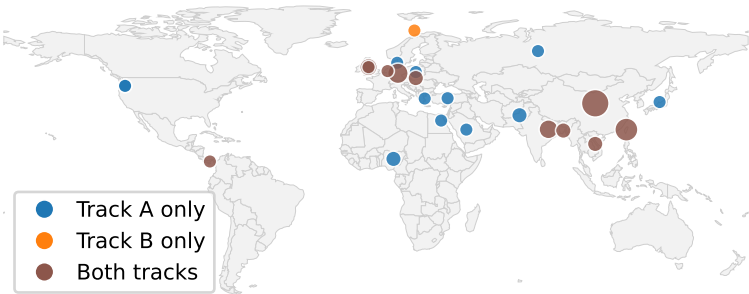

Supplement: SupplementaryMaterial [file 21_affiliations_world_map.pdf › latex/figures/21_affiliations_world_map.pdf]

# Official affiliations: Countries of teams

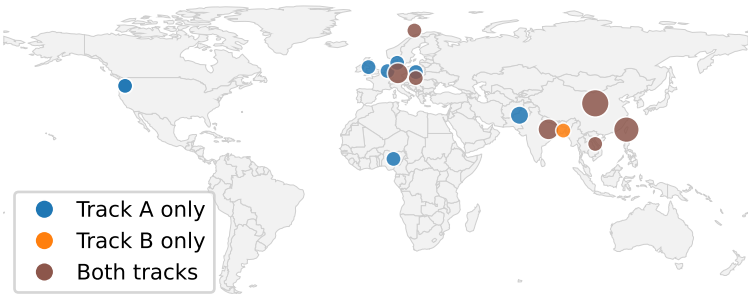

Supplement: SupplementaryMaterial [file 21_affiliations_world_map_from_papers.pdf › latex/figures/21_affiliations_world_map_from_papers.pdf]
